# Supplementary material for: Combination Therapy with GABA and MgSO4 Improves Insulin Sensitivity in Type 2 Diabetic Rat
Source: PubMed Central journal article supplement (PMC8863457; doi:10.1155/2022/2144615), 2022-02-15

Supplementary

FIGURE 1

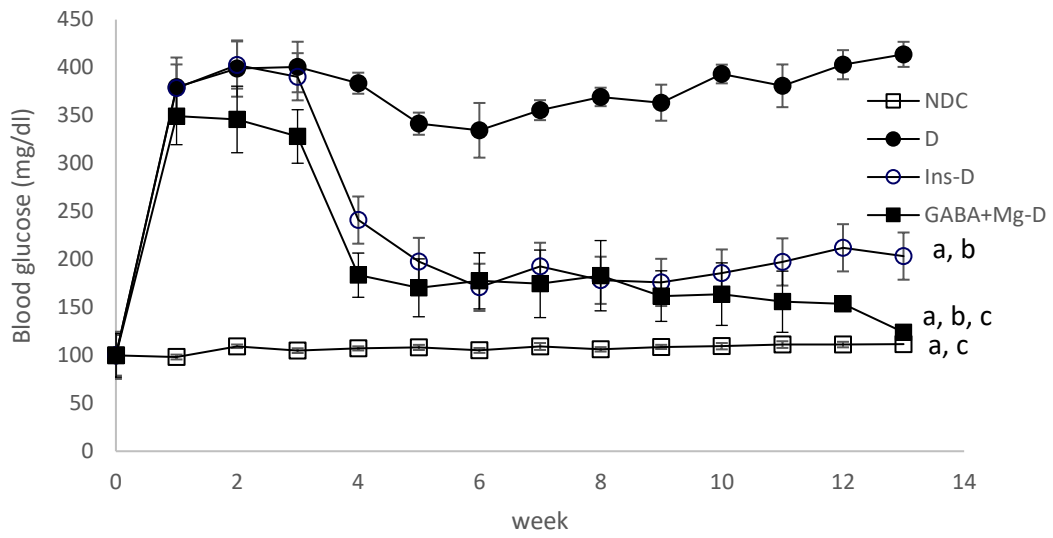

FIGURE 2

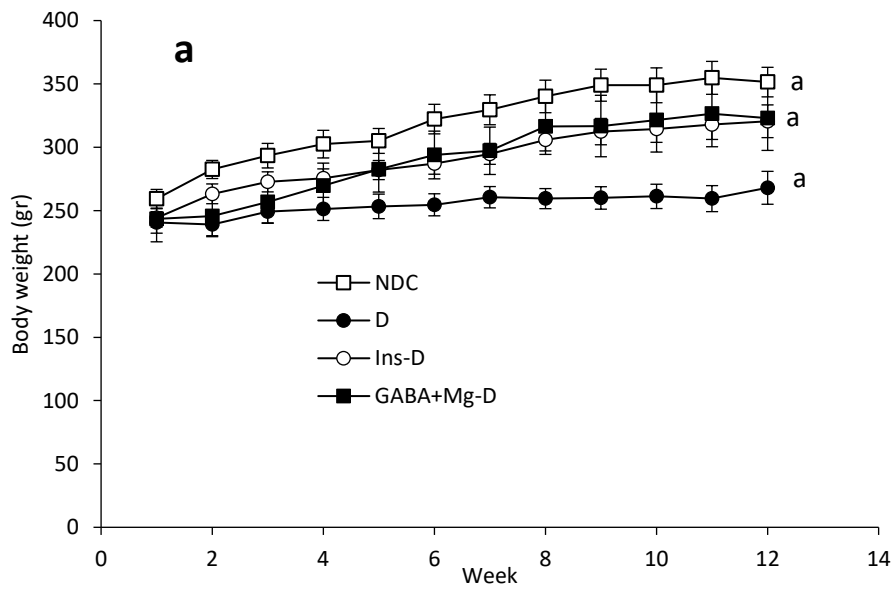

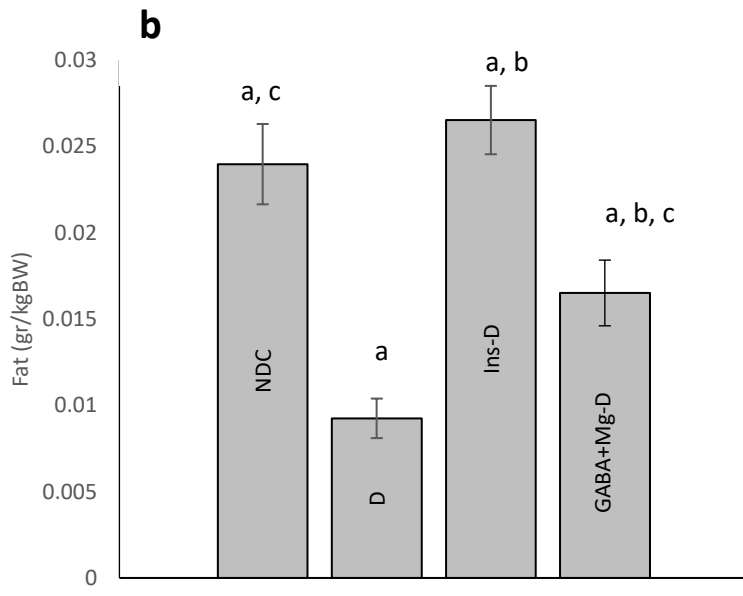

Supplement: 2144615.f1.pdf [file 2144615.f1.pdf]
